# Supplementary material for: Comprehensive Identification and Expression Profiling of Circular RNAs During Nodule Development in Phaseolus vulgaris
Source: Front Plant Sci. 2020 Oct 28;11:587185. doi: 10.3389/fpls.2020.587185 (PMC7655914; doi:10.3389/fpls.2020.587185)
Supplement: Supplementary Table 7 — GO terms of miRNA target genes during nodule organogenesis. [file Table_7.XLSX]

## Sheet: Sheet1
GO Term	Description	GO Class	Gene Ratio	BgRatio	P_value	Gene Count	Gene ID
GO:0022857	transmembrane transporter activity	molecular_function	2020-03-07	552/14531	0.00170186	3	Phvul.011G139800,Phvul.011G178800,Phvul.011G211900
GO:0055085	transmembrane transport	biological_process	2020-03-07	666/14531	0.00292045	3	Phvul.011G139800,Phvul.011G178800,Phvul.011G211900
GO:0005215	transporter activity	molecular_function	2020-03-07	750/14531	0.00409896	3	Phvul.011G139800,Phvul.011G178800,Phvul.011G211900
GO:0022804	active transmembrane transporter activity	molecular_function	2020-02-07	224/14531	0.00472099	2	Phvul.011G139800,Phvul.011G211900
GO:0006810	transport	biological_process	2020-03-07	1254/14531	0.0172176	3	Phvul.011G139800,Phvul.011G178800,Phvul.011G211900
GO:0051234	establishment of localization	biological_process	2020-03-07	1261/14531	0.0174812	3	Phvul.011G139800,Phvul.011G178800,Phvul.011G211900
GO:0051179	localization	biological_process	2020-03-07	1269/14531	0.0177853	3	Phvul.011G139800,Phvul.011G178800,Phvul.011G211900
GO:0008171	O-methyltransferase activity	molecular_function	2020-01-07	53/14531	0.0252591	1	Phvul.L001746
GO:0006855	drug transmembrane transport	biological_process	2020-01-07	59/14531	0.0280839	1	Phvul.011G211900
GO:0015893	drug transport	biological_process	2020-01-07	59/14531	0.0280839	1	Phvul.011G211900
GO:0042493	response to drug	biological_process	2020-01-07	59/14531	0.0280839	1	Phvul.011G211900
GO:0042910	xenobiotic transmembrane transporter activity	molecular_function	2020-01-07	59/14531	0.0280839	1	Phvul.011G211900
GO:0042626	ATPase-coupled transmembrane transporter activity	molecular_function	2020-01-07	87/14531	0.0411734	1	Phvul.011G139800
GO:0015399	primary active transmembrane transporter activity	molecular_function	2020-01-07	91/14531	0.043031	1	Phvul.011G139800
GO:0016020	membrane	cellular_component	2020-03-07	1835/14531	0.0475099	3	Phvul.011G139800,Phvul.011G178800,Phvul.011G211900
GO:0015297	antiporter activity	molecular_function	2020-01-07	105/14531	0.0495081	1	Phvul.011G211900
GO:0016021	integral component of membrane	cellular_component	2020-02-07	858/14531	0.059982	2	Phvul.011G139800,Phvul.011G178800
GO:0031224	intrinsic component of membrane	cellular_component	2020-02-07	873/14531	0.0618815	2	Phvul.011G139800,Phvul.011G178800
GO:0015291	secondary active transmembrane transporter activity	molecular_function	2020-01-07	133/14531	0.0623498	1	Phvul.011G211900
GO:0005575	cellular_component	cellular_component	2020-04-07	3581/14531	0.0672698	4	Phvul.010G088050,Phvul.011G139800,Phvul.011G178800,Phvul.011G211900
GO:0042221	response to chemical	biological_process	2020-01-07	187/14531	0.0866963	1	Phvul.011G211900
GO:0044425	membrane part	cellular_component	2020-02-07	1062/14531	0.0876288	2	Phvul.011G139800,Phvul.011G178800
GO:0008324	cation transmembrane transporter activity	molecular_function	2020-01-07	192/14531	0.0889229	1	Phvul.011G178800
GO:0008168	methyltransferase activity	molecular_function	2020-01-07	248/14531	0.113545	1	Phvul.L001746
GO:0016741	transferase activity, transferring one-carbon groups	molecular_function	2020-01-07	256/14531	0.117016	1	Phvul.L001746
GO:0016887	ATPase activity	molecular_function	2020-01-07	256/14531	0.117016	1	Phvul.011G139800
GO:0006812	cation transport	biological_process	2020-01-07	278/14531	0.126499	1	Phvul.011G178800
GO:0046983	protein dimerization activity	molecular_function	2020-01-07	279/14531	0.126928	1	Phvul.010G088050
GO:0015075	ion transmembrane transporter activity	molecular_function	2020-01-07	295/14531	0.133768	1	Phvul.011G178800
GO:0005524	ATP binding	molecular_function	2020-02-07	1367/14531	0.135164	2	Phvul.011G035600,Phvul.011G139800
GO:0008144	drug binding	molecular_function	2020-02-07	1452/14531	0.149473	2	Phvul.011G035600,Phvul.011G139800
GO:0035639	purine ribonucleoside triphosphate binding	molecular_function	2020-02-07	1554/14531	0.167138	2	Phvul.011G035600,Phvul.011G139800
GO:0017111	nucleoside-triphosphatase activity	molecular_function	2020-01-07	393/14531	0.174666	1	Phvul.011G139800
GO:0016462	pyrophosphatase activity	molecular_function	2020-01-07	402/14531	0.178337	1	Phvul.011G139800
GO:0016818	hydrolase activity, acting on acid anhydrides, in phosphorus-containing anhydrides	molecular_function	2020-01-07	410/14531	0.181589	1	Phvul.011G139800
GO:0016817	hydrolase activity, acting on acid anhydrides	molecular_function	2020-01-07	414/14531	0.183211	1	Phvul.011G139800
GO:0006811	ion transport	biological_process	2020-01-07	415/14531	0.183616	1	Phvul.011G178800
GO:0032559	adenyl ribonucleotide binding	molecular_function	2020-02-07	1682/14531	0.189966	2	Phvul.011G035600,Phvul.011G139800
GO:0030554	adenyl nucleotide binding	molecular_function	2020-02-07	1686/14531	0.19069	2	Phvul.011G035600,Phvul.011G139800
GO:0032555	purine ribonucleotide binding	molecular_function	2020-02-07	1869/14531	0.224378	2	Phvul.011G035600,Phvul.011G139800
GO:0003700	DNA-binding transcription factor activity	molecular_function	2020-01-07	523/14531	0.226356	1	Phvul.010G088050
GO:0017076	purine nucleotide binding	molecular_function	2020-02-07	1882/14531	0.226809	2	Phvul.011G035600,Phvul.011G139800
GO:0032553	ribonucleotide binding	molecular_function	2020-02-07	1887/14531	0.227745	2	Phvul.011G035600,Phvul.011G139800
GO:0097367	carbohydrate derivative binding	molecular_function	2020-02-07	1908/14531	0.231683	2	Phvul.011G035600,Phvul.011G139800
GO:0140110	transcription regulator activity	molecular_function	2020-01-07	558/14531	0.239789	1	Phvul.010G088050
GO:0000166	nucleotide binding	molecular_function	2020-02-07	2123/14531	0.272524	2	Phvul.011G035600,Phvul.011G139800
GO:1901265	nucleoside phosphate binding	molecular_function	2020-02-07	2123/14531	0.272524	2	Phvul.011G035600,Phvul.011G139800
GO:0005634	nucleus	cellular_component	2020-01-07	656/14531	0.276343	1	Phvul.010G088050
GO:0043168	anion binding	molecular_function	2020-02-07	2150/14531	0.277706	2	Phvul.011G035600,Phvul.011G139800
GO:0036094	small molecule binding	molecular_function	2020-02-07	2235/14531	0.294071	2	Phvul.011G035600,Phvul.011G139800
GO:0097159	organic cyclic compound binding	molecular_function	2020-03-07	4194/14531	0.327255	3	Phvul.010G088050,Phvul.011G035600,Phvul.011G139800
GO:1901363	heterocyclic compound binding	molecular_function	2020-03-07	4194/14531	0.327255	3	Phvul.010G088050,Phvul.011G035600,Phvul.011G139800
GO:0043231	intracellular membrane-bounded organelle	cellular_component	2020-01-07	897/14531	0.359892	1	Phvul.010G088050
GO:0043227	membrane-bounded organelle	cellular_component	2020-01-07	906/14531	0.362845	1	Phvul.010G088050
GO:0050896	response to stimulus	biological_process	2020-01-07	929/14531	0.370337	1	Phvul.011G211900
GO:0005515	protein binding	molecular_function	2020-02-07	2634/14531	0.371226	2	Phvul.010G088050,Phvul.010G154000
GO:0006355	regulation of transcription, DNA-templated	biological_process	2020-01-07	941/14531	0.374216	1	Phvul.010G088050
GO:1903506	regulation of nucleic acid-templated transcription	biological_process	2020-01-07	941/14531	0.374216	1	Phvul.010G088050
GO:2001141	regulation of RNA biosynthetic process	biological_process	2020-01-07	941/14531	0.374216	1	Phvul.010G088050
GO:0051252	regulation of RNA metabolic process	biological_process	2020-01-07	942/14531	0.374539	1	Phvul.010G088050
GO:0016740	transferase activity	molecular_function	2020-02-07	2654/14531	0.37508	2	Phvul.011G035600,Phvul.L001746
GO:0019219	regulation of nucleobase-containing compound metabolic process	biological_process	2020-01-07	948/14531	0.37647	1	Phvul.010G088050
GO:0009889	regulation of biosynthetic process	biological_process	2020-01-07	954/14531	0.378396	1	Phvul.010G088050
GO:0010556	regulation of macromolecule biosynthetic process	biological_process	2020-01-07	954/14531	0.378396	1	Phvul.010G088050
GO:0031326	regulation of cellular biosynthetic process	biological_process	2020-01-07	954/14531	0.378396	1	Phvul.010G088050
GO:2000112	regulation of cellular macromolecule biosynthetic process	biological_process	2020-01-07	954/14531	0.378396	1	Phvul.010G088050
GO:0003674	molecular_function	molecular_function	2020-07-07	12649/14531	0.378644	7	Phvul.010G088050,Phvul.010G154000,Phvul.011G035600,Phvul.011G139800,Phvul.011G178800,Phvul.011G211900,Phvul.L001746
GO:0051171	regulation of nitrogen compound metabolic process	biological_process	2020-01-07	967/14531	0.382551	1	Phvul.010G088050
GO:0080090	regulation of primary metabolic process	biological_process	2020-01-07	969/14531	0.383188	1	Phvul.010G088050
GO:0010468	regulation of gene expression	biological_process	2020-01-07	974/14531	0.384778	1	Phvul.010G088050
GO:0031323	regulation of cellular metabolic process	biological_process	2020-01-07	976/14531	0.385414	1	Phvul.010G088050
GO:0060255	regulation of macromolecule metabolic process	biological_process	2020-01-07	998/14531	0.392364	1	Phvul.010G088050
GO:0019222	regulation of metabolic process	biological_process	2020-01-07	1004/14531	0.394247	1	Phvul.010G088050
GO:0003677	DNA binding	molecular_function	2020-01-07	1076/14531	0.416465	1	Phvul.010G088050
GO:0006468	protein phosphorylation	biological_process	2020-01-07	1179/14531	0.447032	1	Phvul.011G035600
GO:0004672	protein kinase activity	molecular_function	2020-01-07	1199/14531	0.452805	1	Phvul.011G035600
GO:0016310	phosphorylation	biological_process	2020-01-07	1255/14531	0.468696	1	Phvul.011G035600
GO:0016301	kinase activity	molecular_function	2020-01-07	1311/14531	0.48419	1	Phvul.011G035600
GO:0016773	phosphotransferase activity, alcohol group as acceptor	molecular_function	2020-01-07	1313/14531	0.484737	1	Phvul.011G035600
GO:0008150	biological_process	biological_process	2020-05-07	9212/14531	0.495598	5	Phvul.010G088050,Phvul.011G035600,Phvul.011G139800,Phvul.011G178800,Phvul.011G211900
GO:0005488	binding	molecular_function	2020-04-07	7344/14531	0.511818	4	Phvul.010G088050,Phvul.010G154000,Phvul.011G035600,Phvul.011G139800
GO:0043229	intracellular organelle	cellular_component	2020-01-07	1420/14531	0.513241	1	Phvul.010G088050
GO:0043226	organelle	cellular_component	2020-01-07	1421/14531	0.513501	1	Phvul.010G088050
GO:0050794	regulation of cellular process	biological_process	2020-01-07	1459/14531	0.523288	1	Phvul.010G088050
GO:0016772	transferase activity, transferring phosphorus-containing groups	molecular_function	2020-01-07	1481/14531	0.528878	1	Phvul.011G035600
GO:0050789	regulation of biological process	biological_process	2020-01-07	1499/14531	0.533409	1	Phvul.010G088050
GO:0006793	phosphorus metabolic process	biological_process	2020-01-07	1504/14531	0.534661	1	Phvul.011G035600
GO:0006796	phosphate-containing compound metabolic process	biological_process	2020-01-07	1504/14531	0.534661	1	Phvul.011G035600
GO:0006464	cellular protein modification process	biological_process	2020-01-07	1509/14531	0.53591	1	Phvul.011G035600
GO:0036211	protein modification process	biological_process	2020-01-07	1509/14531	0.53591	1	Phvul.011G035600
GO:0043412	macromolecule modification	biological_process	2020-01-07	1551/14531	0.546289	1	Phvul.011G035600
GO:0065007	biological regulation	biological_process	2020-01-07	1554/14531	0.547023	1	Phvul.010G088050
GO:0043167	ion binding	molecular_function	2020-02-07	3646/14531	0.557366	2	Phvul.011G035600,Phvul.011G139800
GO:0044424	intracellular part	cellular_component	2020-01-07	1758/14531	0.594589	1	Phvul.010G088050
GO:0003676	nucleic acid binding	molecular_function	2020-01-07	1788/14531	0.601209	1	Phvul.010G088050
GO:0005622	intracellular	cellular_component	2020-01-07	1834/14531	0.61118	1	Phvul.010G088050
GO:0140096	catalytic activity, acting on a protein	molecular_function	2020-01-07	1883/14531	0.621565	1	Phvul.011G035600
GO:0016787	hydrolase activity	molecular_function	2020-01-07	1949/14531	0.635177	1	Phvul.011G139800
GO:0005623	cell	cellular_component	2020-01-07	1967/14531	0.638816	1	Phvul.010G088050
GO:0044464	cell part	cellular_component	2020-01-07	1967/14531	0.638816	1	Phvul.010G088050
GO:0044267	cellular protein metabolic process	biological_process	2020-01-07	1999/14531	0.645208	1	Phvul.011G035600
GO:0003824	catalytic activity	molecular_function	2020-03-07	6620/14531	0.694374	3	Phvul.011G035600,Phvul.011G139800,Phvul.L001746
GO:0019538	protein metabolic process	biological_process	2020-01-07	2387/14531	0.715331	1	Phvul.011G035600
GO:0044260	cellular macromolecule metabolic process	biological_process	2020-01-07	2468/14531	0.728362	1	Phvul.011G035600
GO:1901564	organonitrogen compound metabolic process	biological_process	2020-01-07	2753/14531	0.770234	1	Phvul.011G035600
GO:0043170	macromolecule metabolic process	biological_process	2020-01-07	3056/14531	0.80856	1	Phvul.011G035600
GO:0006807	nitrogen compound metabolic process	biological_process	2020-01-07	3321/14531	0.837451	1	Phvul.011G035600
GO:0044237	cellular metabolic process	biological_process	2020-01-07	3483/14531	0.853202	1	Phvul.011G035600
GO:0044238	primary metabolic process	biological_process	2020-01-07	4018/14531	0.8963	1	Phvul.011G035600
GO:0071704	organic substance metabolic process	biological_process	2020-01-07	4275/14531	0.9128	1	Phvul.011G035600
GO:0009987	cellular process	biological_process	2020-01-07	4416/14531	0.920856	1	Phvul.011G035600
GO:0008152	metabolic process	biological_process	2020-01-07	5976/14531	0.975508	1	Phvul.011G035600
