# Supplementary material for: Comprehensive Identification and Expression Profiling of Circular RNAs During Nodule Development in Phaseolus vulgaris
Source: Front Plant Sci. 2020 Oct 28;11:587185. doi: 10.3389/fpls.2020.587185 (PMC7655914; doi:10.3389/fpls.2020.587185)
Supplement: Supplementary Table 8 — KEGG pathways of miRNA target genes during nodule organogenesis. [file Table_8.XLSX]

## Sheet: Sheet1
KO ID	Description	KEGG Class	Gene Ratio	BgRatio	P_value	Gene Count	Gene ID
ko00945	Stilbenoid, diarylheptanoid and gingerol biosynthesis	Metabolism	2020-01-02	4/2180	0.0036672	1	Phvul.L001746
ko04976	Bile secretion	Organismal Systems	2020-01-02	4/2180	0.0036672	1	Phvul.011G139800
ko02010	ABC transporters	Environmental Information Processing	2020-01-02	5/2180	0.00458295	1	Phvul.011G139800
ko00360	Phenylalanine metabolism	Metabolism	2020-01-02	14/2180	0.0128057	1	Phvul.L001746
ko00941	Flavonoid biosynthesis	Metabolism	2020-01-02	14/2180	0.0128057	1	Phvul.L001746
ko05206	MicroRNAs in cancer	Human Diseases	2020-01-02	15/2180	0.0137173	1	Phvul.011G139800
ko00940	Phenylpropanoid biosynthesis	Metabolism	2020-01-02	19/2180	0.0173592	1	Phvul.L001746
ko01110	Biosynthesis of secondary metabolites	Metabolism	2020-01-02	397/2180	0.331124	1	Phvul.L001746
ko01100	Metabolic pathways	Metabolism	2020-01-02	830/2180	0.616618	1	Phvul.L001746
